# Supplementary material for: Photoelectrocatalytic bacterial inactivation of Acinetobacter baumannii on Cu2O/TiO2@Cu mesh photoanodes
Source: Royal Society of Chemistry journal article supplement (doi:10.1039/d0cy01500h), 2020-01-01
Supplement: d0cy01500h1.pdf [file d0cy01500h1.pdf]

**Photoelectrocatalytic Bacterial Inactivation of *Acinetobacter*  
*baumannii* on Cu<sub>2</sub>O/TiO<sub>2</sub>@Cu Mesh Photoanode**

Mengna Ding,<sup>†a</sup> Fengyan Shi,<sup>†a</sup> Huijuan Zhu,<sup>a</sup> Yuping Yang,<sup>a</sup> Jiahui Zhong,<sup>a</sup> Liulin

Luo,<sup>\*b</sup> Yuning Huo,<sup>\*a</sup> and Hexing Li<sup>a</sup>

**Supporting Information**

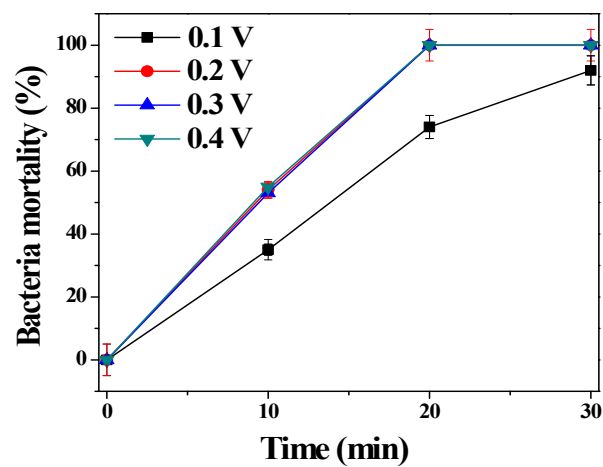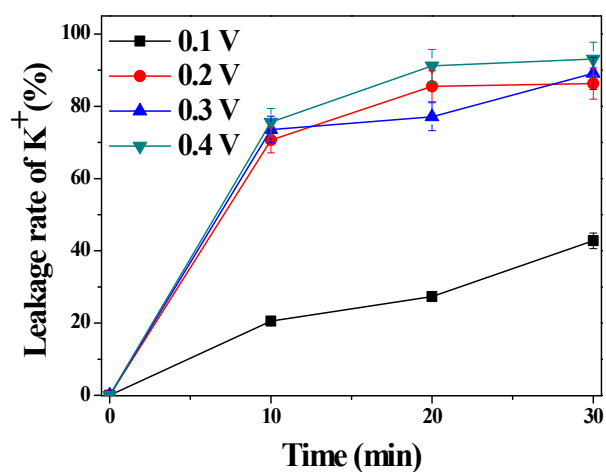

**Fig. S1** (a) PEC inactivation activity of *A. baumannii* and (b) leakage of  $K^+$  ions from *A. baumannii* under different bias potential. Test conditions: 30 mL  $10^8$  cfu/mL (0.5 MFC) *A. baumannii* (ATCC 19606), one Cu mesh ( $2.0 \times 2.0$  cm) coated with  $Cu_2O/TiO_2$  as photoanode, Pt foil ( $2.0 \times 2.0$  cm) as counter electrode, one xenon lamp (300 W,  $\lambda > 420$  nm),  $T = 25$  °C.

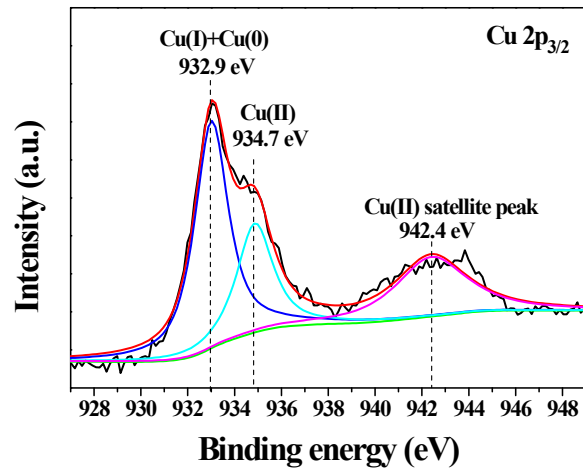

**Fig. S2.** XPS spectrum of Cu species in  $\text{Cu}_2\text{O}/\text{TiO}_2@\text{Cu}$  meshes after PEC inactivation. Test conditions were given in Figure 3.

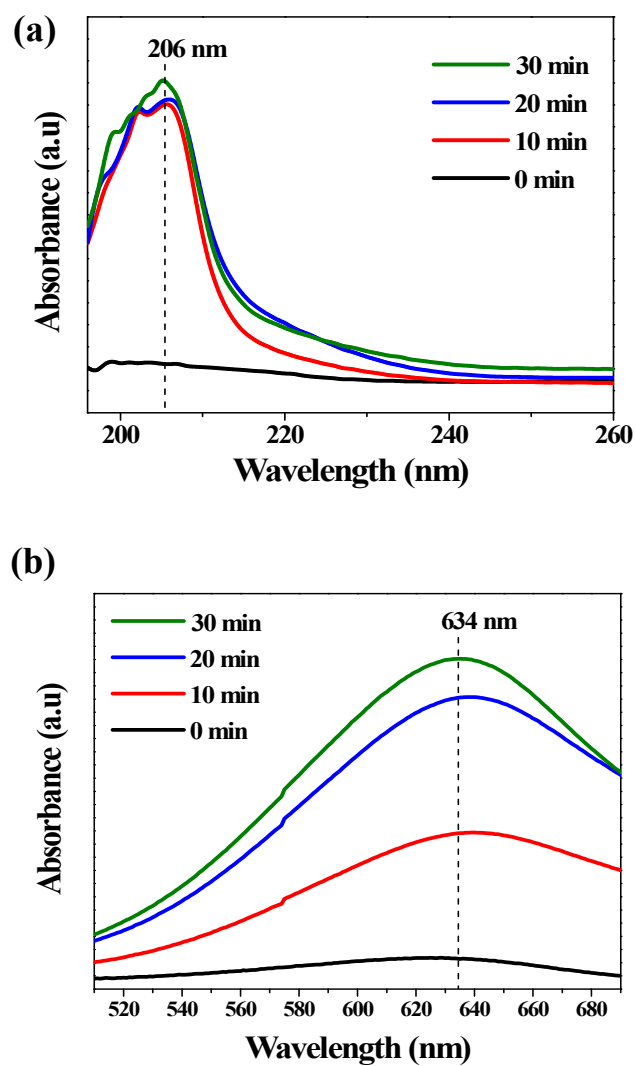

**Fig. S3.** Time resolved UV-vis absorption of (a)  $\text{NO}_3^-$  and (b)  $\text{NH}_4^+$  ions in the bacterial solution during PEC inactivation process on  $\text{Cu}_2\text{O}/\text{TiO}_2/\text{Cu}$  mesh. Test conditions were given in Figure 3.

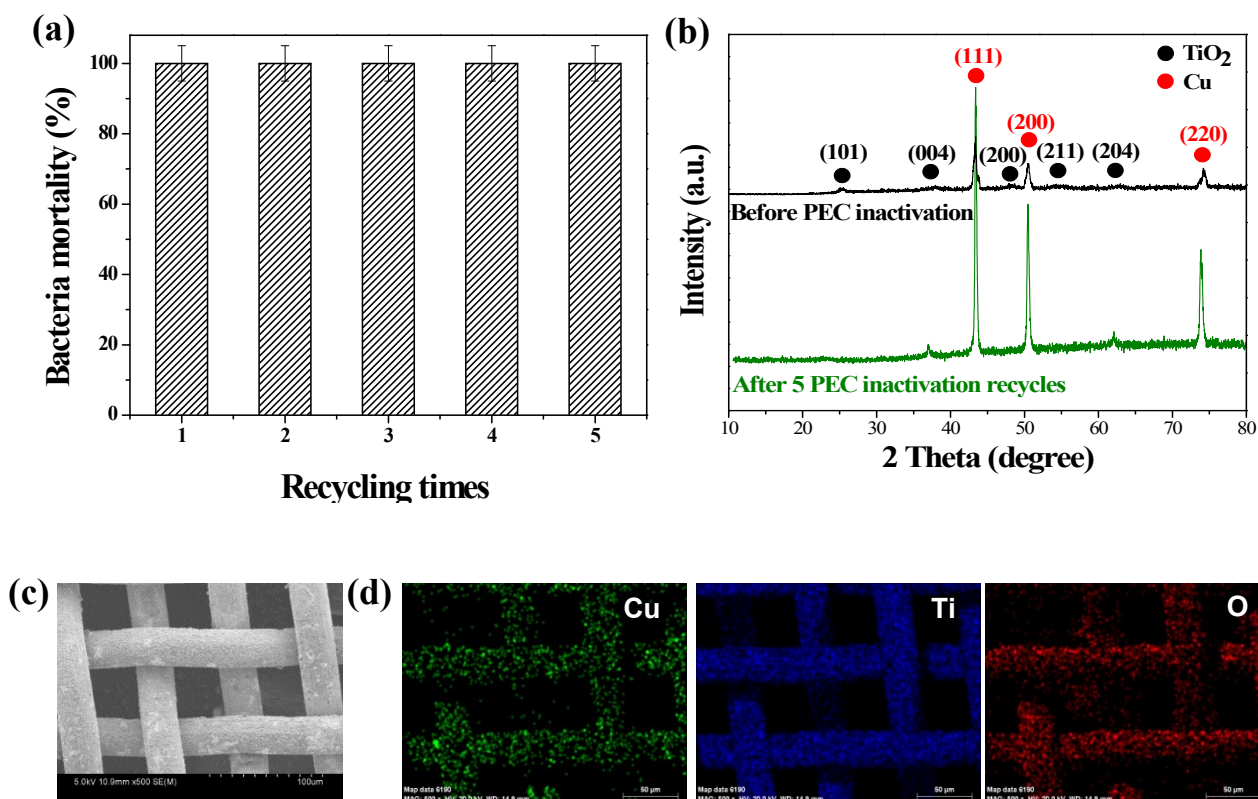

**Fig. S4.** (a) Recycling PEC inactivation activity of *A. baumannii* on Cu<sub>2</sub>O/TiO<sub>2</sub>@Cu mesh, (b) XRD patterns of Cu<sub>2</sub>O/TiO<sub>2</sub>@Cu mesh before and after the recycling test, (c) FESEM image of Cu<sub>2</sub>O/TiO<sub>2</sub>@Cu mesh, and (d) chemical mapping of Cu, Ti and O elements after the recycling test. Test conditions: 30 mL 10<sup>8</sup> cfu/mL (0.5 MFC) *A. baumannii* (ATCC 19606), one Cu mesh (2.0 × 2.0 cm) coated with Cu<sub>2</sub>O/TiO<sub>2</sub> as photoanode, Pt foil (2.0 × 2.0 cm) as counter electrode, one xenon lamp (300 W, λ > 420 nm), t = 30 min, T = 25 °C.
